# Supplementary material
Source: publisher figshare collection journal article supplement (https://acs.figshare.com/ndownloader/files/5837505)
Supplement: Supplementary file 1 [file 5837505]

## Supporting Information

# Ruthenium-Catalyzed ROM-RCM of Cycloalkene-Yne

Miwako Mori\*, Yuichi Kuzuba, Tsuyoshi Kitamura, and Yoshihiro Sato

Graduate School of Pharmaceutical Sciences, Hokkaido University

Sapporo 060-0812, Japan

Fax: +81-11-706-4982 e-mail: mori@pharm.hokudai.ac.jp

### General Information:

The metathesis reactions were carried out under an atmosphere of ethylene (1 atm) unless otherwise mentioned, and all the reaction solutions were degassed through freeze-pump-thaw cycle.  $\text{CH}_2\text{Cl}_2$  was distilled under an argon atmosphere from  $\text{CaH}_2$ . Toluene was distilled under an argon atmosphere from Na-benzophenone. Ethylene gas was purified by passage through the aqueous  $\text{CuCl}$  solution (2 g of  $\text{CuCl}$  in 180 ml of sat.  $\text{NH}_4\text{Cl}$  aq.) and conc.  $\text{H}_2\text{SO}_4$  and then  $\text{KOH}$  tube. Ruthenium catalyst **1** was purchased from Strem Chemicals.

## Typical Procedure for the Synthesis of Cycloalkene-yne 2.

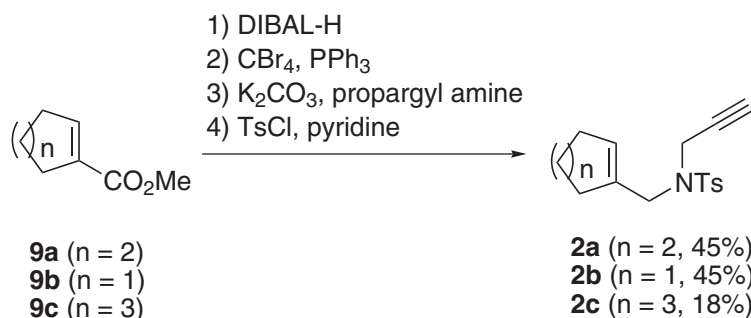

To a solution of **9a** (1.4 ml, 10 mmol) in  $\text{CH}_2\text{Cl}_2$  (33 ml) was added DIBAL-H (28 ml, 26 mmol, 0.93 M in hexane), and the solution was stirred at  $-78^\circ\text{C}$  for 2.5 h. To this solution was added MeOH and 3N NaOH aq. at  $-78^\circ\text{C}$  and the aqueous layer was extracted with  $\text{Et}_2\text{O}$ . The organic layer was washed with brine, dried over  $\text{Na}_2\text{SO}_4$  and evaporated.

To a solution of the crude alcohol in  $\text{CH}_2\text{Cl}_2$  (19 ml) was added  $\text{CBr}_4$  (4.4 g, 13 mmol) and  $\text{PPh}_3$  (4.0 g, 15 mmol), and the solution was stirred at room temperature for 3 h.

To a solution of propargyl bromide (3.4 ml, 50 mmol) and  $\text{K}_2\text{CO}_3$  (5.5 g, 40 mmol) in  $\text{CH}_3\text{CN}$  (75 ml) was added the above solution, and the whole solution was stirred at room temperature for 16 h. Then the solution was filtered through celite. To this mother liquid was added pyridine (9.1 ml, 113 mmol) and p-toluenesulfonyl chloride (14.4 g, 75 mmol), and the solution was stirred at room temperature for 45 h. To this solution was added MeOH and the solution was diluted with ethyl acetate. The organic layer was washed with 10 % HCl aq., 10 % NaOH aq., and brine, dried over  $\text{Na}_2\text{SO}_4$  and evaporated. After the solvent was removed, the residue was purified by flash column chromatography on silica gel (hexane/ethyl acetate 20:1) to yield **2a** (1.37 g, 45%) as colorless crystals.

Ester **9c** was prepared according to the literature procedure. (Pawlak, J. L.; Berchtold, G. A. *J. Org. Chem.* **1988**, 53, 4063.)

## Typical Procedure for the Metathesis Reaction of 2b.

To a solution of **2b** (83.4 mg, 0.29 mmol) in  $\text{CH}_2\text{Cl}_2$  (9.5 ml, 0.03 M) was added **1b** (26.1 mg, 30  $\mu\text{mol}$ , 10 mol %), and the solution was refluxed under an atmosphere of ethylene for 26 h. To this solution was added an excess of ethyl vinyl ether. After the solvent was removed, the residue was purified by flash column chromatography on silica gel (hexane/ethyl acetate 4:1) to yield **3b** (83 mg, quant.) as colorless crystals.

## Spectral Data:

**N-Cyclohex-1-enylmethyl-4-methyl-N-prop-2-ynyl-benzenesulfonamide (2a).** Colorless crystals. mp  $54\text{--}54.5^\circ\text{C}$ . (ether/hexane); IR (nujol)  $\nu$  3292, 2926, 2853, 1596, 1346, 1158  $\text{cm}^{-1}$ ;  $^1\text{H}$  NMR (270 MHz,  $\text{CDCl}_3$ )  $\delta$  1.57 (m, 4 H), 1.94 (t,  $J = 2.4$  Hz, 1 H), 1.99 (m, 4 H), 2.42 (s, 3 H), 3.67 (s, 2 H), 4.02 (d,  $J = 2.4$  Hz, 2 H), 5.68 (s, 1 H), 7.28 ( $J = 8.4$  Hz, 2 H), 7.73 (d,  $J = 8.4$  Hz, 2 H);  $^{13}\text{C}$  NMR (67.5 MHz,  $\text{CDCl}_3$ )  $\delta$  21.48 ( $\text{CH}_3$ ), 22.19 ( $\text{CH}_2$ ), 22.46 ( $\text{CH}_2$ ), 25.20 ( $\text{CH}_2$ ), 25.84 ( $\text{CH}_2$ ), 35.19 ( $\text{CH}_2$ ), 52.76 ( $\text{CH}_2$ ), 73.44 (CH), 76.64 (C), 127.62 (CH), 127.75 (CH x 2), 129.31 (CH x 2), 131.61 (C), 136.17 (C), 143.29 (C); LRMS  $m/z$  303 ( $\text{M}^+$ ), 288, 222, 155, 148, 91; HRMS calcd for  $\text{C}_{17}\text{H}_{21}\text{NO}_2\text{S}$  ( $\text{M}^+$ ) 303.1293, found 303.1303; Anal. calcd for  $\text{C}_{17}\text{H}_{21}\text{NO}_2\text{S}$ : C, 67.29; H, 6.98; N, 4.62; S, 10.57. found: C, 67.11; H, 7.13; N, 4.47; S, 10.71.

**N-Cyclopent-1-enylmethyl-4-methyl-N-prop-2-ynyl-benzenesulfonamide (2b).** Colorless crystals. mp 55.5 °C. (ether/hexane); IR (nujol)  $\nu$  3259, 2923, 2114, 1654, 1596, 1343, 1160  $\text{cm}^{-1}$ ;  $^1\text{H}$  NMR (270 MHz,  $\text{CDCl}_3$ )  $\delta$  1.89 (dt,  $J = 7.3$  Hz, 2 H), 1.97 (t,  $J = 2.4$  Hz, 1 H), 2.24-2.36 (m, 4 H), 2.42 (s, 3 H), 3.86 (s, 2 H), 4.04 (d,  $J = 2.4$  Hz, 2 H), 5.69 (brs, 1 H), 7.28 (d,  $J = 8.1$  Hz, 2 H), 7.74 (d,  $J = 8.1$  Hz, 2 H);  $^{13}\text{C}$  NMR (67.5 MHz,  $\text{CDCl}_3$ )  $\delta$  21.51 ( $\text{CH}_3$ ), 23.36 ( $\text{CH}_2$ ), 32.46 ( $\text{CH}_2$ ), 32.98 ( $\text{CH}_2$ ), 35.64 ( $\text{CH}_2$ ), 46.52 ( $\text{CH}_2$ ), 73.50 (CH), 76.68 (C), 127.76 (CH x 2), 129.36 (CH x 2), 130.55 (CH), 136.14 (C), 138.20 (C), 143.38 (C); LRMS  $m/z$  289 ( $\text{M}^+$ ), 155, 134, 91; Anal. calcd for  $\text{C}_{16}\text{H}_{19}\text{NO}_2\text{S}$ : C, 66.41; H, 6.62; N, 4.84; S, 11.08. found: C, 66.42; H, 6.73; N, 4.79; S, 11.14.

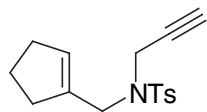

**N-Cyclohept-1-enylmethyl-4-methyl-N-prop-2-ynyl-benzenesulfonamide (2c).** Colorless crystals. mp 72-73 °C. (ether/hexane); IR (nujol)  $\nu$  3304, 2922, 2852, 1654, 1597, 1348, 1163  $\text{cm}^{-1}$ ;  $^1\text{H}$  NMR (270 MHz,  $\text{CDCl}_3$ )  $\delta$  1.48-1.54 (m, 4 H), 1.69 (m, 2 H), 1.92 (t,  $J = 2.4$  Hz, 1 H), 2.08-2.21 (m, 4 H), 2.42 (s, 3 H), 3.65 (s, 2 H), 4.04 (d,  $J = 2.4$  Hz, 2 H), 5.79 (m, 1 H), 7.28 (d,  $J = 8.4$  Hz, 2 H), 7.74 (d,  $J = 8.4$  Hz, 2 H);  $^{13}\text{C}$  NMR (67.5 MHz,  $\text{CDCl}_3$ )  $\delta$  21.51 ( $\text{CH}_3$ ), 26.70 ( $\text{CH}_2$ ), 26.96 ( $\text{CH}_2$ ), 28.45 ( $\text{CH}_2$ ), 30.01 ( $\text{CH}_2$ ), 32.20 ( $\text{CH}_2$ ), 35.13 ( $\text{CH}_2$ ), 54.43 ( $\text{CH}_2$ ), 73.55 (CH), 77.20 (C), 127.85 (CH x 2), 129.31 (CH x 2), 132.87 (CH), 136.15 (C), 137.66 (C), 143.32 (C); LRMS  $m/z$  317 ( $\text{M}^+$ ), 162, 155, 91; Anal. calcd for  $\text{C}_{16}\text{H}_{19}\text{NO}_2\text{S}$ : C, 68.10; H, 7.30; N, 4.41; S, 10.10. found: C, 68.00; H, 7.28; N, 4.46; S, 10.16.

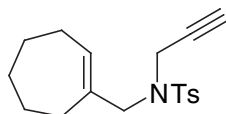

**N-Cyclohex-1-enylmethyl-4-methyl-N-(2-methylene-but-3-enyl)-benzenesulfonamide (3a).** Colorless oil. IR (neat)  $\nu$  1597, 1338, 1160  $\text{cm}^{-1}$ ;  $^1\text{H}$  NMR (400 MHz,  $\text{CDCl}_3$ )  $\delta$  1.46-1.51 (m, 4 H), 1.81 (br, 2 H), 1.90 (br, 2 H), 2.42 (s, 3 H), 3.64 (s, 2 H), 3.91 (s, 2 H), 5.05 (s, 1 H), 5.06 (d,  $J = 10.8$  Hz, 1 H), 5.13 (s, 1 H), 5.29 (d,  $J = 18.0$  Hz, 1 H), 5.46 (br, 1 H), 6.30 (dd,  $J = 18.0, 10.8$  Hz, 1 H), 7.29 (d,  $J = 8.4$  Hz, 2 H), 7.70 (d,  $J = 8.4$  Hz, 2 H);  $^{13}\text{C}$  NMR (100 MHz,  $\text{CDCl}_3$ )  $\delta$  21.54 ( $\text{CH}_3$ ), 22.13 ( $\text{CH}_2$ ), 22.45 ( $\text{CH}_2$ ), 25.17 ( $\text{CH}_2$ ), 26.18 ( $\text{CH}_2$ ), 48.61 ( $\text{CH}_2$ ), 54.55 ( $\text{CH}_2$ ), 114.28 ( $\text{CH}_2$ ), 117.63 ( $\text{CH}_2$ ), 126.80 (CH), 127.21 (CH x 2), 129.38 (CH x 2), 132.30 (C), 136.58 (CH), 137.02 (C), 140.27 (C), 142.89 (C); LRMS  $m/z$  331 ( $\text{M}^+$ ), 316, 302, 290, 276, 264, 249, 236, 198, 184, 176, 155, 148, 133, 119, 106; HRMS calcd for  $\text{C}_{19}\text{H}_{25}\text{NO}_2\text{S}$  ( $\text{M}^+$ ) 331.1606, found 331.1606; Anal. calcd for  $\text{C}_{19}\text{H}_{25}\text{NO}_2\text{S}$ : C, 68.85; H, 7.60; N, 4.23; S, 9.67. found: C, 68.73; H, 7.61; N, 4.29; S, 9.77.

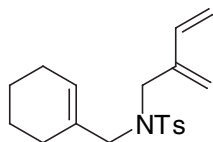

**2-(Toluene-4-sulfonyl)-2,3,4,5,6,7-hexahydro-1H-cycloocta[c]pyrrole (4a).** Colorless solid. IR (nujol)  $\nu$  2924, 2854, 1654, 1344, 1162  $\text{cm}^{-1}$ ;  $^1\text{H}$  NMR (270 MHz,  $\text{CDCl}_3$ )  $\delta$  1.45-1.52 (m, 2 H), 1.59-1.67 (m, 2 H), 2.03-2.07 (m, 2 H), 2.13-2.17 (m, 2 H), 2.43 (s, 3 H), 4.03 (s, 4 H), 5.62-5.66 (m, 2 H), 7.32 (d,  $J = 8.1$  Hz, 2 H), 7.72 (d,  $J = 8.1$  Hz, 2 H);  $^{13}\text{C}$  NMR (67.5 MHz,  $\text{CDCl}_3$ )  $\delta$  21.55 ( $\text{CH}_3$ ), 21.55 ( $\text{CH}_2$ ), 25.38 ( $\text{CH}_2$ ), 27.01 ( $\text{CH}_2$ ), 27.05 ( $\text{CH}_2$ ), 58.15 ( $\text{CH}_2$ ), 59.18 ( $\text{CH}_2$ ), 122.34 (CH), 127.12 (C), 127.49 (CH x 2), 129.70 (CH x 2), 132.67 (CH), 132.92 (C), 134.27 (C), 143.34 (C); LRMS  $m/z$  303 ( $\text{M}^+$ ), 155, 148, 91; HRMS calcd for  $\text{C}_{17}\text{H}_{21}\text{NO}_2\text{S}$  ( $\text{M}^+$ ) 303.1293, found 303.1299.

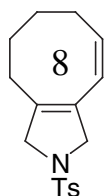

**2-(Toluene-4-sulfonyl)-1,2,3,4,5,6-hexahydro-cyclohepta[c]pyrrole (4b).** Colorless crystals. mp 111-113 °C. (ether); IR (nujol)  $\nu$  2924, 2854, 1654, 1344, 1163  $\text{cm}^{-1}$ ;  $^1\text{H}$  NMR (400 MHz,  $\text{CDCl}_3$ )  $\delta$  1.78 (m, 2 H), 2.20 (br, 2 H), 2.31 (m, 2 H), 2.43 (s, 3 H), 4.10 (br, 4 H), 5.52 (d,  $J = 11.6$  Hz, 1 H), 5.83 (dt,  $J = 11.6, 5.6$  Hz, 1 H), 7.32 (d,  $J = 8.0$  Hz, 2 H), 7.72 (d,  $J = 8.0$  Hz, 2 H);  $^{13}\text{C}$  NMR (100 MHz,  $\text{CDCl}_3$ )  $\delta$  21.56 ( $\text{CH}_3$ ), 23.38

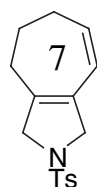

(CH<sub>2</sub>), 29.47 (CH<sub>2</sub>), 30.59 (CH<sub>2</sub>), 58.41 (CH<sub>2</sub>), 59.53 (CH<sub>2</sub>), 120.32 (CH), 127.20 (C), 127.41 (CH x 2), 129.62 (CH x 2), 133.93 (C), 134.14 (C), 134.65 (CH), 143.24 (C); LRMS *m/z* 289 (M<sup>+</sup>), 155, 134, 91; HRMS calcd for C<sub>16</sub>H<sub>19</sub>NO<sub>2</sub>S (M<sup>+</sup>) 289.1136, found 289.1124.

**Dimeric compound (5a).** Colorless solid. IR (nujol)  $\nu$  2924, 2854, 1598, 1348, 1157 cm<sup>-1</sup>; <sup>1</sup>H NMR (400 MHz, CDCl<sub>3</sub>)  $\delta$  1.29-1.39 (m, 8 H), 2.05-2.09 (m, 4 H), 2.12-2.16 (m, 4 H), 2.41 (s, 6 H), 4.06 (s, 4 H), 4.16 (s, 4 H), 5.34 (m, 2 H), 6.10 (d, *J* = 16.0 Hz, 2 H), 7.30 (d, *J* = 8.0 Hz, 4 H), 7.70 (d, *J* = 8.0 Hz, 4 H); <sup>13</sup>C NMR (100 MHz, CDCl<sub>3</sub>)  $\delta$  21.52 (CH<sub>3</sub> x 2), 24.36 (CH<sub>2</sub> x 2), 25.57 (CH<sub>2</sub> x 2), 26.82 (CH<sub>2</sub> x 2), 30.94 (CH<sub>2</sub> x 2), 55.09 (CH<sub>2</sub> x 2), 57.48 (CH<sub>2</sub> x 2), 121.76 (CH x 2), 127.44 (CH x 4), 129.00 (C x 2), 129.72 (CH x 4), 131.63 (CH x 2), 133.24 (C x 2), 134.29 (C x 2), 143.37 (C x 2); LRMS *m/z* 606 (M<sup>+</sup>), 518, 451, 295, 155, 91; HRMS calcd for C<sub>34</sub>H<sub>42</sub>N<sub>2</sub>O<sub>4</sub>S<sub>2</sub> (M<sup>+</sup>) 606.2586, found 606.2581.

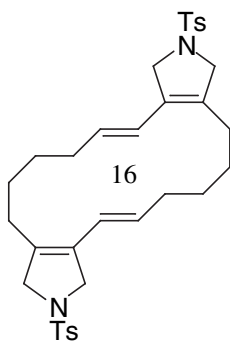

**Dimeric compound (5c).** Colorless solid. IR (nujol)  $\nu$  2923, 2854, 1598, 1348, 1157 cm<sup>-1</sup>; <sup>1</sup>H NMR (400 MHz, CDCl<sub>3</sub>)  $\delta$  0.99-1.38 (m, 12 H), 2.01-2.14 (m, 8 H), 2.42 (s, 6 H), 4.05 (s, 4 H), 4.19 (s, 4 H), 5.33 (m, 2 H), 6.02 (d, *J* = 15.6 Hz, 2 H), 7.32 (d, *J* = 8.0 Hz, 4 H), 7.73 (d, *J* = 8.0 Hz, 4 H); <sup>13</sup>C NMR (100 MHz, CDCl<sub>3</sub>)  $\delta$  21.59 (CH<sub>3</sub> x 2), 25.31 (CH<sub>2</sub> x 2), 26.85 (CH<sub>2</sub> x 2), 27.00 (CH<sub>2</sub> x 2), 27.94 (CH<sub>2</sub> x 2), 33.12 (CH<sub>2</sub> x 2), 55.19 (CH<sub>2</sub> x 2), 57.00 (CH<sub>2</sub> x 2), 121.59 (CH x 2), 127.42 (CH x 4), 129.46 (C x 2), 129.64 (CH x 4), 132.08 (CH x 2), 132.43 (C x 2), 134.11 (CH x 2), 143.28 (C x 2); LRMS *m/z* 634 (M<sup>+</sup>), 479, 451, 323, 155, 91; HRMS calcd for C<sub>36</sub>H<sub>46</sub>N<sub>2</sub>O<sub>4</sub>S<sub>2</sub> (M<sup>+</sup>) 634.2899, found 634.2902.

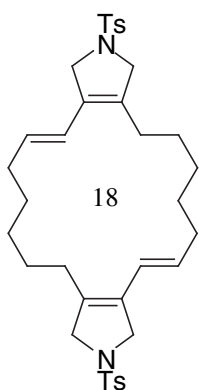

### 3-Hex-5-enyl-1-(toluene-4-sulfonyl)-4-vinyl-2,5-dihydro-1H-pyrrole (6a).

Colorless solid. IR (film)  $\nu$  2926, 2855, 1654, 1598, 1347, 1164 cm<sup>-1</sup>; <sup>1</sup>H NMR (400 MHz, CDCl<sub>3</sub>)  $\delta$  1.26-1.40 (m, 4 H), 1.98-2.05 (m, 2 H), 2.12-2.15 (m, 2 H), 2.43 (s, 3 H), 4.11 (s, 2 H), 4.22 (s, 2 H), 4.93-4.99 (m, 3 H), 5.12 (d, *J* = 10.8 Hz, 1 H), 5.74 (m, 1 H), 6.43 (dd, *J* = 17.2, 10.8 Hz, 1 H), 7.32 (d, *J* = 8.1 Hz, 2 H), 7.73 (d, *J* = 8.0 Hz, 2 H); <sup>13</sup>C NMR (100 MHz, CDCl<sub>3</sub>)  $\delta$  21.58 (CH<sub>3</sub>), 26.03 (CH<sub>2</sub>), 27.30

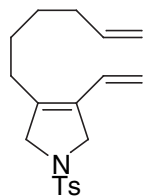

(CH<sub>2</sub>), 28.47 (CH<sub>2</sub>), 33.42 (CH<sub>2</sub>), 54.87 (CH<sub>2</sub>), 57.61 (CH<sub>2</sub>), 114.68 (CH<sub>2</sub>), 115.31 (CH<sub>2</sub>), 127.36 (CH x 2), 129.38 (CH), 129.71 (CH x 2), 130.80 (C), 133.90 (C), 135.84 (C), 138.28 (CH), 143.37 (C); LRMS *m/z* 331 (M<sup>+</sup>), 248, 176, 155, 91; HRMS calcd for C<sub>19</sub>H<sub>25</sub>NO<sub>2</sub>S (M<sup>+</sup>) 331.1606, found 331.1592.
